# Supplementary material for: Self-assembled micelles of a multi-functional amphiphilic fusion (MFAF) peptide for targeted cancer therapy
Source: Royal Society of Chemistry journal article supplement (doi:10.1039/c5py00125k), 2015-01-01
Supplement: c5py00125k1.pdf [file c5py00125k1.pdf]

## **Supporting Information**

*of*

### **Self-assembled micelles of multi-functional amphiphilic fusion (MFAF) peptide for targeted cancer therapy**

5

Yin-Jia Cheng, Hong Cheng, Xiao-Ding Xu,\* Ren-Xi Zhuo and Feng He\*

Key Laboratory of Biomedical Polymers of Ministry of Education & Department of Chemistry, Wuhan

10

University, Wuhan 430072, P. R. China

15

20 \*Corresponding author. E-mail address: xd-xu@whu.edu.cn; hefeng@whu.edu.cn

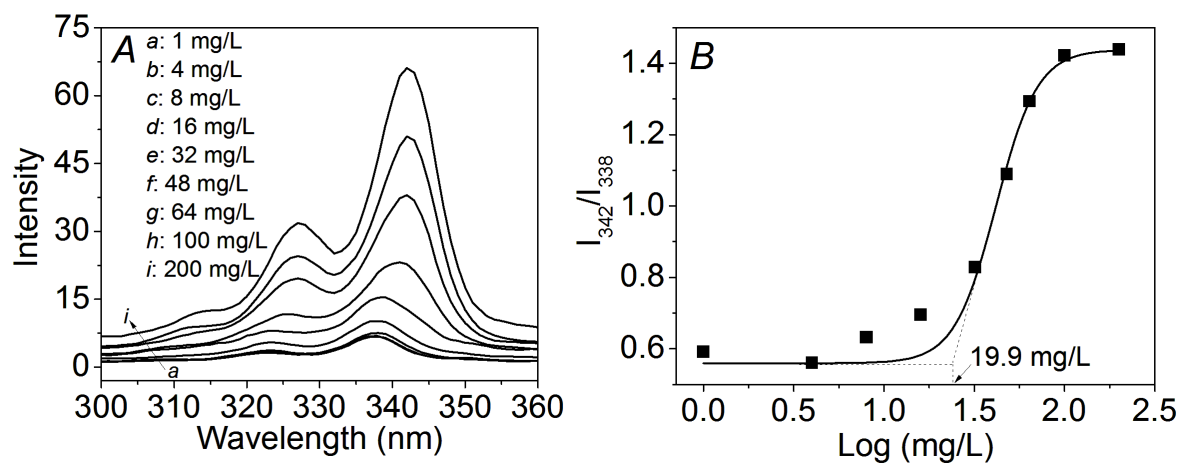

**Fig. S1.** (A) Fluorescent excitation spectra of pyrene with increasing concentration of the MFAF peptide; (B) The intensity of  $I_1$ ,  $I_3$  in the excitation spectra as a function of logarithm of the concentration of the MFAF peptide.

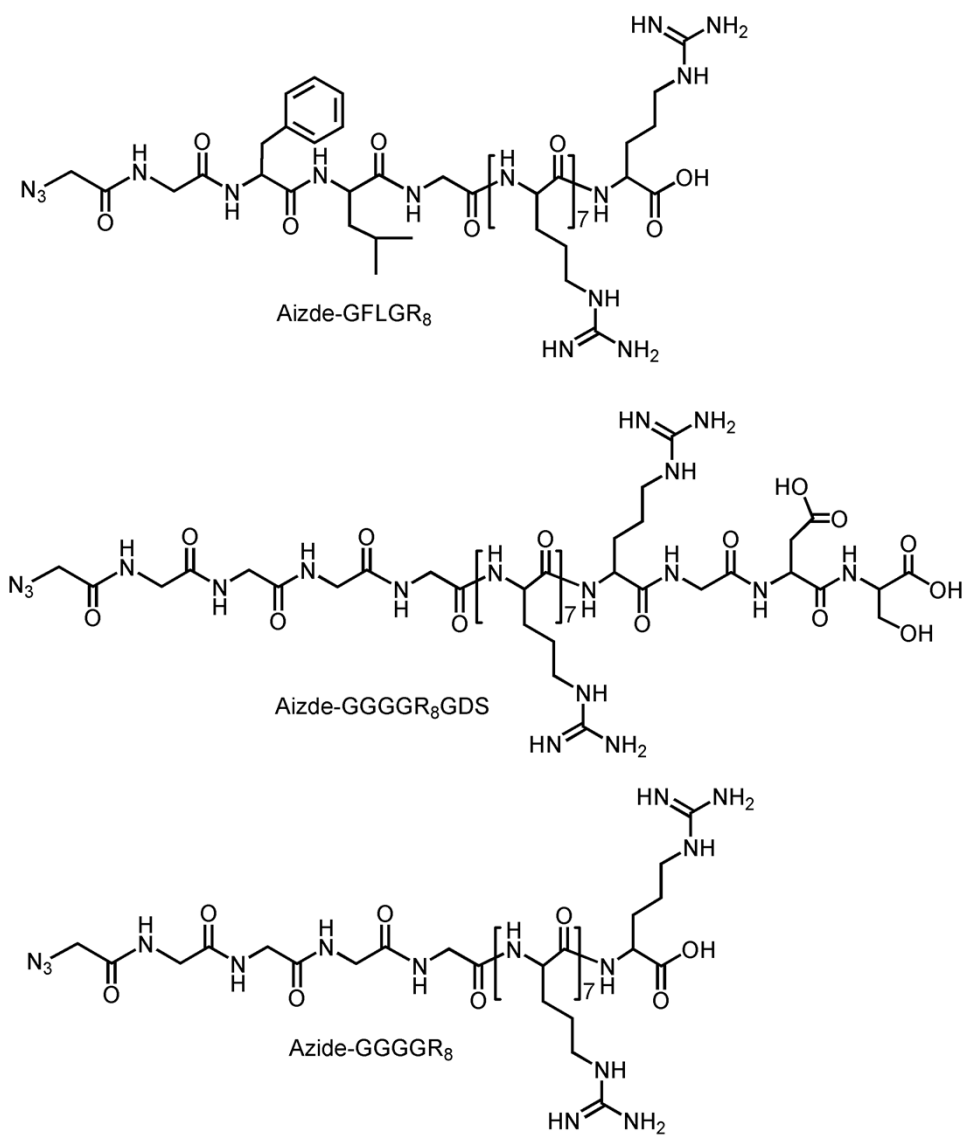

**Fig. S2.** Molecular structures of the different azide-terminated functional peptides (azide-GFLGR<sub>8</sub>, azide-GGGGR<sub>8</sub>GDS and azide-GGGGR<sub>8</sub>).

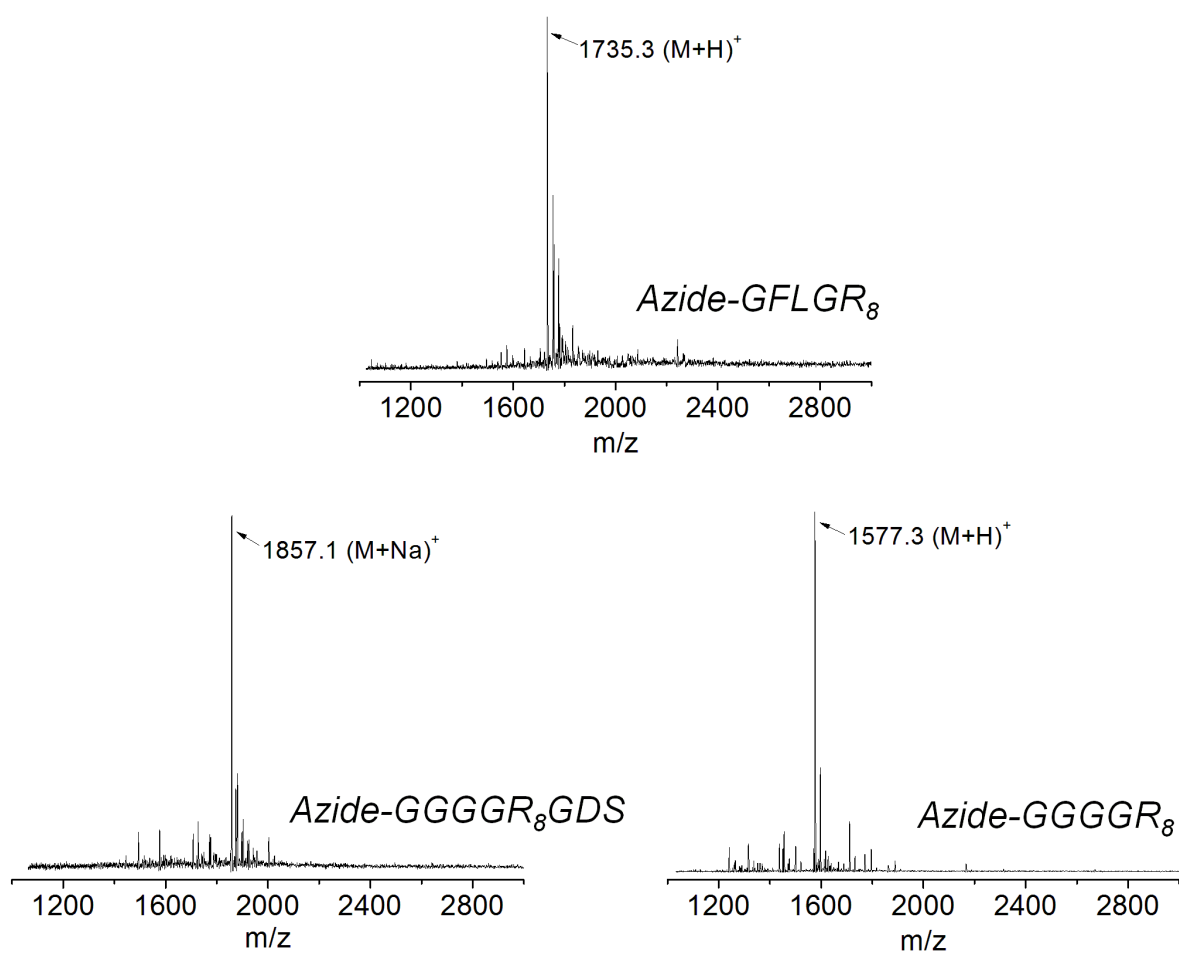

**Fig. S3.** MALDI-TOF-MS spectra of the azide-terminated functional peptides (azide-GFLGR<sub>8</sub>, azide-GGGGR<sub>8</sub>GDS and azide-GGGGR<sub>8</sub>).

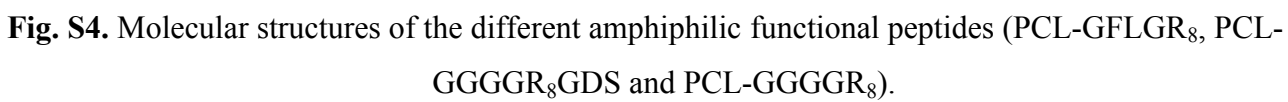

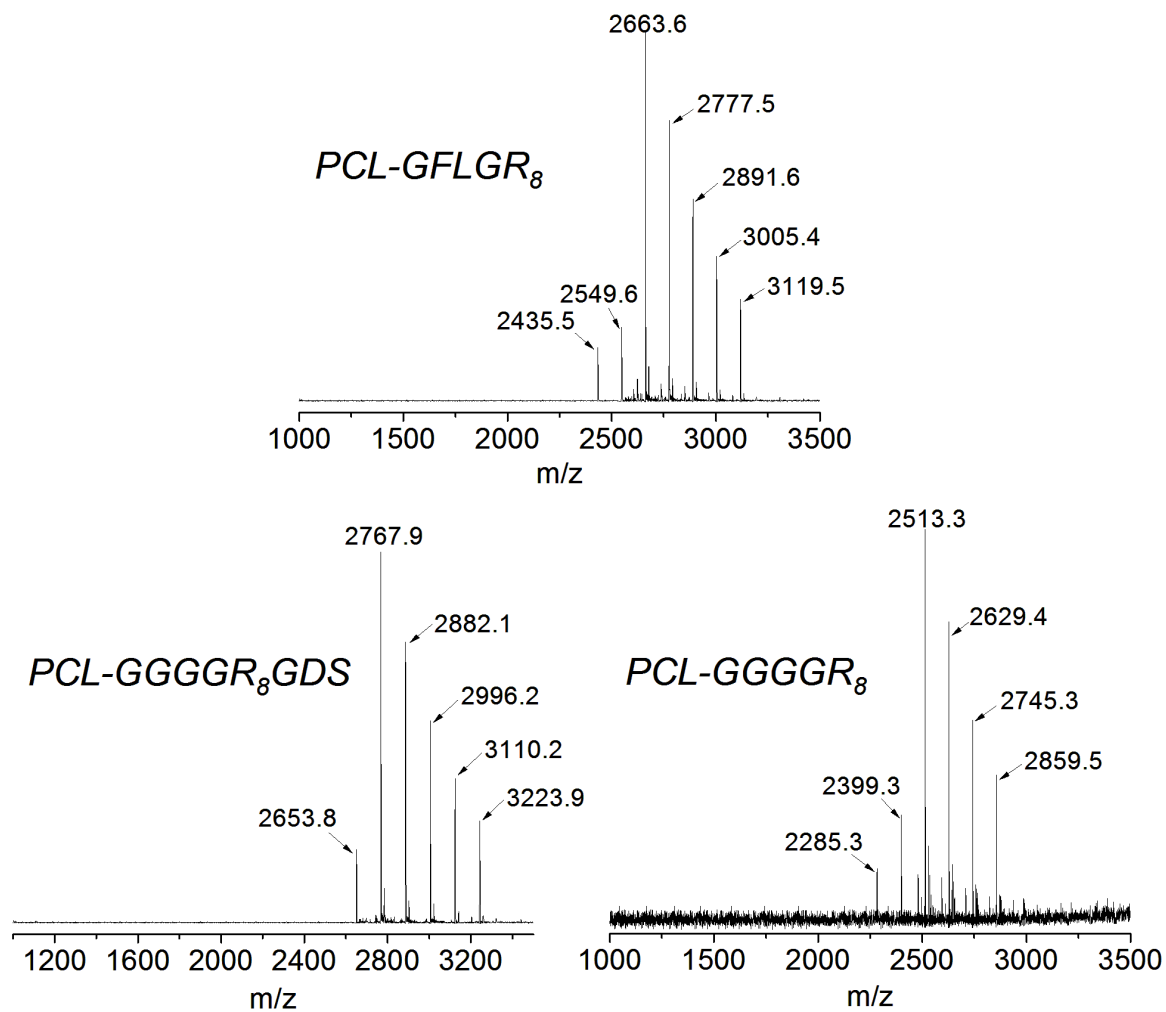

**Fig. S5.** MALDI-TOF-MS spectra of the different amphiphilic functional peptides (PCL-GFLGR<sub>8</sub>, PCL-GGGGR<sub>8</sub>GDS and PCL-GGGGR<sub>8</sub>).
